# Supplementary material for: Preferential retention of genes from one parental genome after polyploidy illustrates the nature and scope of the genomic conflicts induced by hybridization
Source: PubMed Central journal article supplement (PMC5891031; doi:10.1371/journal.pgen.1007267), 2018-03-28
Supplement: pgen.1007267.s003.pdf [file pgen.1007267.s003.pdf]

**A) GO Molecular Function**

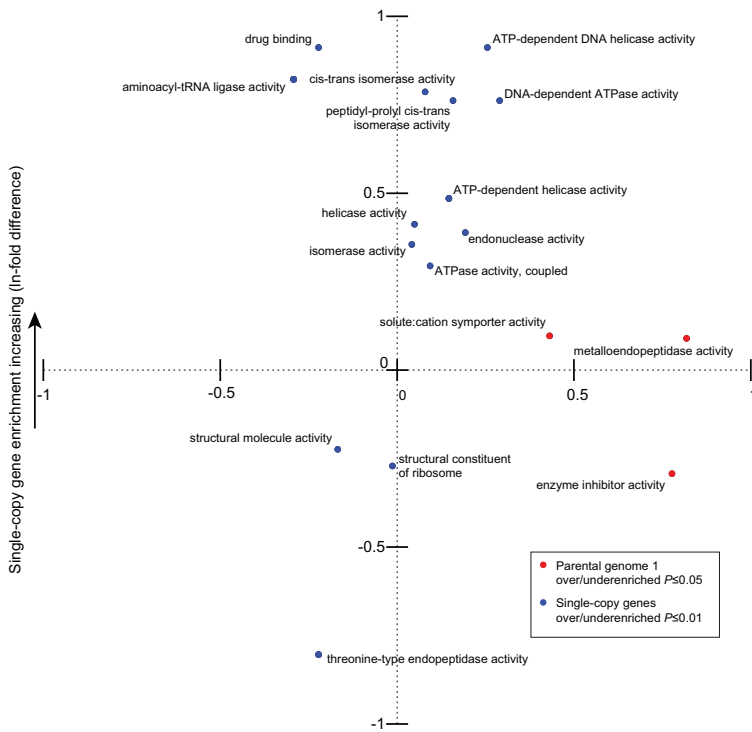

**B) GO Biological Process**

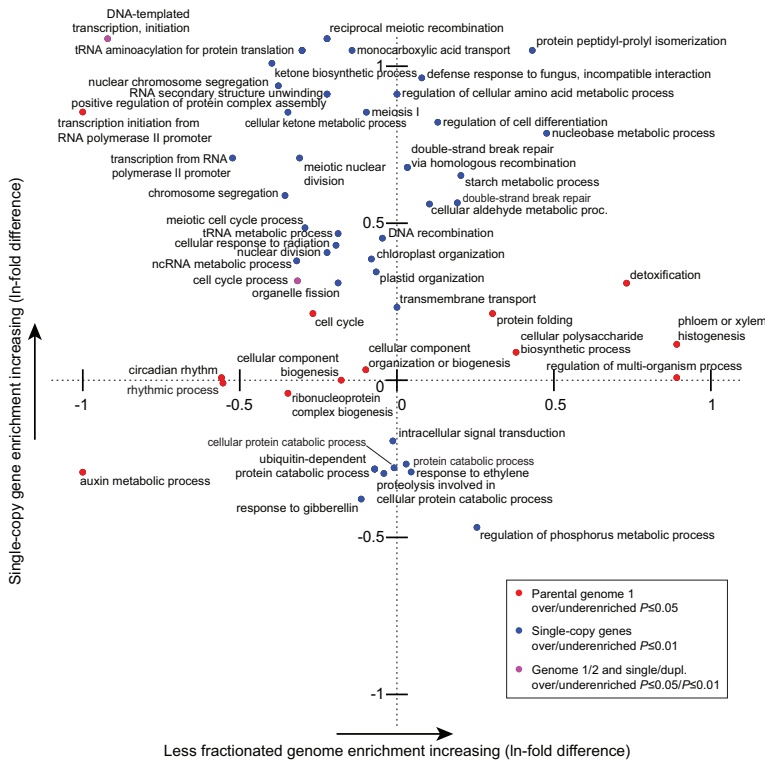

**S3 Fig: Statistically overrepresented GO terms associated with At- $\alpha$  duplication status and parental genome of origin (see *Methods*) **A)** Molecular function hierarchy. **B)** Biological processes hierarchy. On the y axis is the ln(fold-enrichment) of the term in**

question among the single copy genes relative to the duplicates. Blue dots represent terms that are significantly over/underrepresented in single copy genes relative to duplicates with Bonferroni corrected P-value  $\leq 0.01$  and are  $>1.5$  fold over/underrepresented. On the  $x$ -axis is the  $\ln(\text{fold-enrichment})$  of GO terms of genes from subgenome 1 relative to those from subgenome 2. The GO terms that are over/underrepresented in genes from subgenome 1 (the less fractionated subgenome) with P-value  $\leq 0.05$  after Bonferroni correction are shown in triangles. GO terms that are significantly different both between the single copy and duplicate genes and between subgenome 1 and subgenome 2 are shown in dark purple.
