# Supplementary material for: Preferential retention of genes from one parental genome after polyploidy illustrates the nature and scope of the genomic conflicts induced by hybridization
Source: PLoS Genet. 2018 Mar 28;14(3):e1007267. doi: 10.1371/journal.pgen.1007267 (PMC5891031; doi:10.1371/journal.pgen.1007267)
Supplement: S2 Data — (XLSX) [file pgen.1007267.s010.xlsx]

## Sheet: Figure_2
Underlying data for x&y axes for Figure 2, panels A&B
Subgenome Confidence (x axis, both panels)	P-value (y axis, Panel A)	Ratio of Crossing interactions (y axis, Panel B)
0.6	0.004	0.428089
0.7	0.008	0.429236
0.8	0.025	0.426602
0.9	0.006	0.412352
0.95	0.028	0.412262
0.99	0.045	0.405063

## Sheet: Figure_3C
Underlying data for x&y axes for Figure 3, panel C
Block Size	Block Start	Block End	Block Midpoint (x axis)	Copy2Bias/Epsilon (y axis)
Number of pillars in the large blocks of Figure 3B	First pillar in the block	Last pillar in the block	(Block End-Block Start)/2	ML estimate of the epsilon parameter from this block alone
239	1	240	121	0.6994
212	248	460	354.5	0.7982
154	461	615	538.5	0.5655
436	616	1052	834.5	0.8016
135	1190	1325	1258	0.7319
245	1473	1718	1596	0.7053
189	1719	1908	1814	0.5082
205	2112	2317	2215	0.9901
322	2318	2640	2479.5	0.7802
243	2641	2884	2763	0.9701
140	2885	3025	2955.5	0.8523
327	3026	3353	3190	0.9955
386	3354	3740	3547.5	0.7906
190	3741	3931	3836.5	0.6355
193	4008	4201	4105	0.6982
169	4317	4486	4402	0.7568

## Sheet: Figure_5
Underlying data for x&y axes for Figure 5
X: log(fold) SG1 vs. SG2	Y: log(fold) Sing. vs. Dupl.	GO term	Enrichment
0.232996	-0.0222764	endoplasmic reticulum part (GO:0044432)	Subgenome 1, P<0.05
0.164353	0.075547	endoplasmic reticulum (GO:0005783)	Subgenome 1, P<0.05
0.0791812	1.08796	mediator complex (GO:0016592)	Single-copy genes, P<0.01
0.0334238	0.434954	plastid membrane (GO:0042170)	Single-copy genes, P<0.01
0.0681859	0.432241	chloroplast membrane (GO:0031969)	Single-copy genes, P<0.01
0.0606978	0.250822	chloroplast part (GO:0044434)	Single-copy genes, P<0.01
0.0211893	0.245245	chloroplast envelope (GO:0009941)	Single-copy genes, P<0.01
0.0606978	0.244621	plastid part (GO:0044435)	Single-copy genes, P<0.01
0.117271	0.244011	photosynthetic membrane (GO:0034357)	Single-copy genes, P<0.01
0.00860017	0.238834	plastid envelope (GO:0009526)	Single-copy genes, P<0.01
0.10721	0.237481	thylakoid membrane (GO:0042651)	Single-copy genes, P<0.01
0.0606978	0.228846	thylakoid part (GO:0044436)	Single-copy genes, P<0.01
0.00860017	0.223662	thylakoid (GO:0009579)	Single-copy genes, P<0.01
0.0170333	0.215441	chloroplast stroma (GO:0009570)	Single-copy genes, P<0.01
0.00860017	0.208945	chloroplast thylakoid (GO:0009534)	Single-copy genes, P<0.01
0.0211893	0.204423	plastid stroma (GO:0009532)	Single-copy genes, P<0.01
0.0413927	-0.219751	intracellular ribonucleoprotein complex (GO:0030529)	Ohnologs, P<0.01
0.0413927	-0.219751	ribonucleoprotein complex (GO:1990904)	Ohnologs, P<0.01
0.0211893	-0.267726	ribosome (GO:0005840)	Ohnologs, P<0.01
0.0569049	-0.379899	ribosomal subunit (GO:0044391)	Ohnologs, P<0.01
0.09691	-0.404028	cytosolic part (GO:0044445)	Ohnologs, P<0.01
0.167317	-0.429075	cytosolic ribosome (GO:0022626)	Ohnologs, P<0.01
0.176091	-0.526155	large ribosomal subunit (GO:0015934)	Ohnologs, P<0.01
0.623249	-0.741152	cytosolic large ribosomal subunit (GO:0022625)	Ohnologs, P<0.01
0.0791812	-0.627707	proteasome core complex (GO:0005839)	Ohnologs, P<0.01
-0.221849	-0.593009	NADH dehydrogenase complex (GO:0030964)	Ohnologs, P<0.01
-0.221849	-0.593009	mitochondrial respiratory chain complex I (GO:0005747)	Ohnologs, P<0.01
-0.221849	-0.593009	respiratory chain complex I (GO:0045271)	Ohnologs, P<0.01
-0.443697	-0.449671	endopeptidase complex (GO:1905369)	Ohnologs, P<0.01
-0.443697	-0.449671	proteasome complex (GO:0000502)	Ohnologs, P<0.01
0.0791812	-0.41701	respiratory chain complex (GO:0098803)	Ohnologs, P<0.01
0.0211893	-0.412079	clathrin-coated vesicle (GO:0030136)	Ohnologs, P<0.01
